# Supplementary material
Source: PubMed Central journal article supplement (PMC9760524)
Supplement: sj-pdf-1-mia-10.1177_1329878X221145022.pdf [file sj-pdf-1-mia-10.1177_1329878X221145022.pdf]

**Supplementary material**  
**Academic explanatory journalism and emerging COVID-19 science**

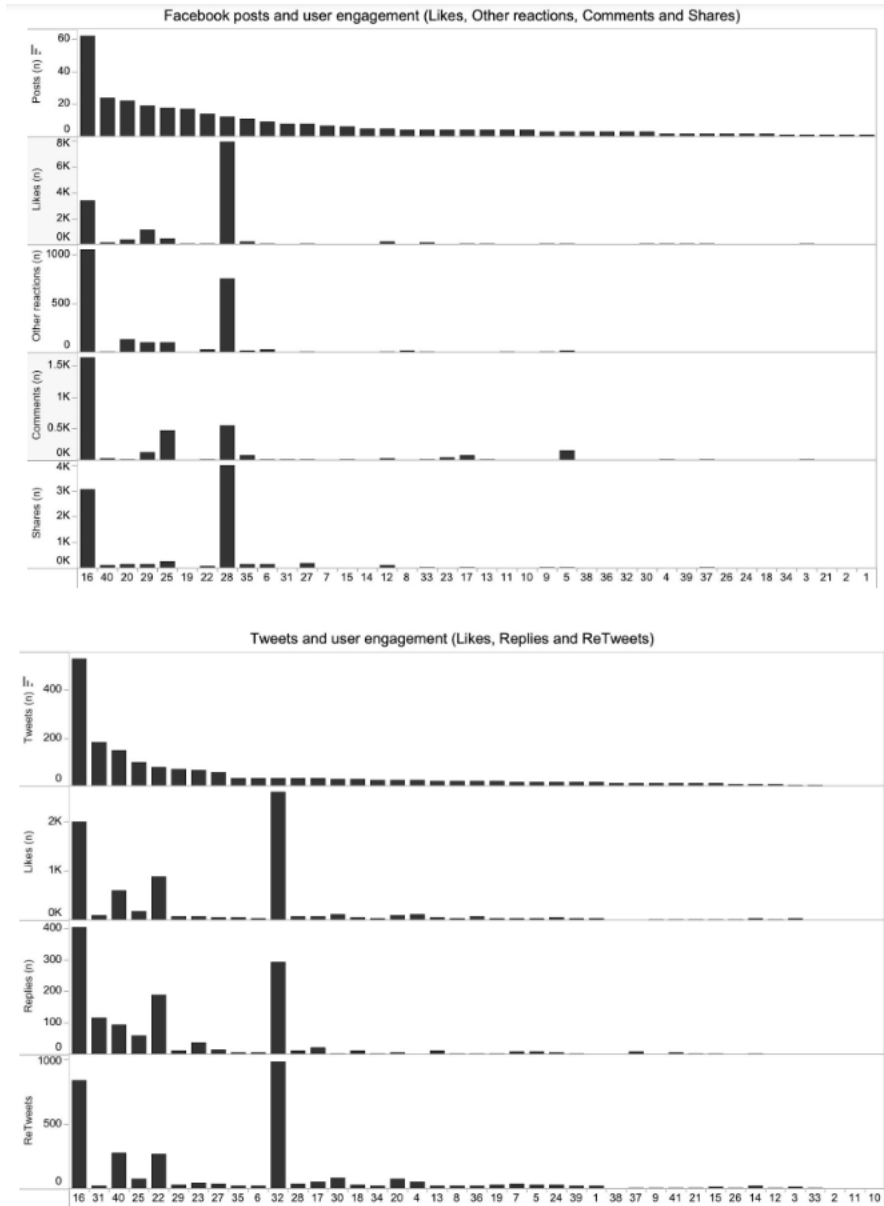

Figure 1. Twitter and Facebook engagement with *The Conversation* media stories mentioning COVID-19 preprints

| TC article no | FB posts (n) | Comments (n) | Likes (n) | Shares (n) | Other reactions (n) |
|---------------|--------------|--------------|-----------|------------|---------------------|
| 16            | 61           | 1627         | 3369      | 3068       | 1049                |
| 40            | 24           | 30           | 148       | 115        | 13                  |
| 20            | 20           | 22           | 413       | 137        | 133                 |
| 25            | 18           | 478          | 470       | 263        | 106                 |
| 29            | 18           | 130          | 1168      | 152        | 101                 |
| 19            | 15           | 3            | 47        | 19         | 5                   |
| 22            | 14           | 11           | 94        | 60         | 30                  |
| 28            | 12           | 555          | 7912      | 3985       | 752                 |
| 35            | 11           | 84           | 255       | 144        | 16                  |
| 6             | 9            | 12           | 85        | 146        | 26                  |
| 27            | 8            | 21           | 101       | 181        | 15                  |
| 31            | 8            | 9            | 19        | 6          | 0                   |
| 14            | 5            | 0            | 4         | 9          | 1                   |
| 8             | 4            | 3            | 28        | 18         | 16                  |
| 10            | 4            | 1            | 20        | 10         | 4                   |
| 11            | 4            | 4            | 38        | 8          | 7                   |
| 12            | 4            | 25           | 214       | 123        | 12                  |
| 13            | 4            | 14           | 47        | 12         | 5                   |
| 17            | 4            | 80           | 69        | 33         | 2                   |
| 23            | 4            | 44           | 36        | 11         | 2                   |
| 33            | 4            | 20           | 116       | 57         | 6                   |
| 5             | 3            | 162          | 55        | 27         | 20                  |
| 7             | 3            | 3            | 20        | 13         | 1                   |
| 9             | 3            | 1            | 54        | 40         | 6                   |
| 15            | 3            | 10           | 5         | 3          | 1                   |
| 30            | 3            | 3            | 43        | 12         | 0                   |
| 32            | 3            | 2            | 9         | 9          | 4                   |
| 36            | 3            | 0            | 14        | 5          | 1                   |
| 38            | 3            | 5            | 25        | 19         | 2                   |
| 4             | 2            | 14           | 46        | 9          | 3                   |
| 18            | 2            | 0            | 1         | 0          | 0                   |
| 24            | 2            | 0            | 12        | 5          | 0                   |
| 26            | 2            | 0            | 10        | 6          | 0                   |
| 37            | 2            | 11           | 42        | 39         | 4                   |
| 39            | 2            | 4            | 42        | 7          | 4                   |
| 1             | 1            | 0            | 10        | 1          | 0                   |
| 2             | 1            | 0            | 1         | 2          | 0                   |
| 3             | 1            | 15           | 62        | 7          | 1                   |
| 21            | 1            | 0            | 8         | 1          | 1                   |
| 34            | 1            | 6            | 11        | 9          | 2                   |

| TC article no | Tweets (n) | Likes (n) | Retweets (n) | Replies (n) |
|---------------|------------|-----------|--------------|-------------|
| 16            | 530        | 1,988     | 839          | 404         |
| 31            | 183        | 93        | 24           | 117         |
| 40            | 147        | 596       | 279          | 95          |
| 25            | 98         | 174       | 73           | 59          |
| 22            | 80         | 884       | 266          | 188         |
| 29            | 70         | 81        | 34           | 14          |
| 23            | 66         | 88        | 45           | 38          |
| 27            | 57         | 70        | 40           | 15          |
| 35            | 35         | 70        | 25           | 5           |
| 6             | 32         | 43        | 22           | 5           |
| 32            | 32         | 2,594     | 986          | 292         |
| 28            | 31         | 73        | 36           | 12          |
| 17            | 31         | 72        | 50           | 21          |
| 30            | 28         | 114       | 84           | 3           |
| 18            | 28         | 59        | 31           | 12          |
| 34            | 26         | 45        | 26           | 3           |
| 20            | 26         | 91        | 79           | 7           |
| 4             | 23         | 118       | 55           | 1           |
| 13            | 21         | 52        | 23           | 12          |
| 8             | 20         | 46        | 20           | 2           |
| 36            | 19         | 87        | 26           | 2           |
| 19            | 19         | 44        | 30           | 3           |
| 7             | 18         | 31        | 35           | 8           |
| 5             | 18         | 45        | 31           | 10          |
| 24            | 18         | 51        | 33           | 7           |
| 39            | 17         | 37        | 22           | 4           |
| 1             | 15         | 37        | 20           | 1           |
| 38            | 14         | 10        | 2            | 1           |
| 37            | 14         | 7         | 8            | 9           |
| 9             | 12         | 24        | 10           | 1           |
| 41            | 12         | 19        | 4            | 5           |
| 21            | 12         | 12        | 9            | 2           |
| 15            | 11         | 16        | 12           | 3           |
| 26            | 10         | 22        | 10           | 1           |
| 14            | 10         | 42        | 24           | 4           |
| 12            | 7          | 14        | 7            | 0           |
| 3             | 6          | 34        | 17           | 0           |
| 33            | 4          | 10        | 8            | 1           |
| 2             | 0          | 0         | 0            | 0           |
| 11            | 0          | 0         | 0            | 0           |
| 10            | 0          | 0         | 0            | 0           |

Table 1. Twitter and Facebook engagement with The Conversation media stories mentioning COVID-19 preprints

| Story number | Story title                                                                                                       | Publication date | Story URL                                                                                                                                                                                                                                                                                                             |
|--------------|-------------------------------------------------------------------------------------------------------------------|------------------|-----------------------------------------------------------------------------------------------------------------------------------------------------------------------------------------------------------------------------------------------------------------------------------------------------------------------|
| 1            | How social media is changing research and reactions to coronavirus outbreak                                       | 30/1/20          | <a href="https://theconversation.com/how-social-media-is-changing-research-and-reactions-to-coronavirus-outbreak-130748">https://theconversation.com/how-social-media-is-changing-research-and-reactions-to-coronavirus-outbreak-130748</a>                                                                           |
| 2            | R0: How scientists quantify the intensity of an outbreak like coronavirus and predict the pandemic's spread       | 5/2/20           | <a href="https://theconversation.com/r0-how-scientists-quantify-the-intensity-of-an-outbreak-like-coronavirus-and-predict-the-pandemics-spread-130777">https://theconversation.com/r0-how-scientists-quantify-the-intensity-of-an-outbreak-like-coronavirus-and-predict-the-pandemics-spread-130777</a>               |
| 3            | Yes, Australians on board the Diamond Princess need to go into quarantine again. It's time to reset the clock     | 20/2/20          | <a href="https://theconversation.com/yes-australians-on-board-the-diamond-princess-need-to-go-into-quarantine-again-its-time-to-reset-the-clock-131906">https://theconversation.com/yes-australians-on-board-the-diamond-princess-need-to-go-into-quarantine-again-its-time-to-reset-the-clock-131906</a>             |
| 4            | The hunt for a coronavirus cure is showing how science can change for the better                                  | 24/2/20          | <a href="https://theconversation.com/the-hunt-for-a-coronavirus-cure-is-showing-how-science-can-change-for-the-better-132130">https://theconversation.com/the-hunt-for-a-coronavirus-cure-is-showing-how-science-can-change-for-the-better-132130</a>                                                                 |
| 5            | COVID-19 death toll estimated to reach 3,900 by next Friday, according to AI modelling                            | 6/3/20           | <a href="https://theconversation.com/covid-19-death-toll-estimated-to-reach-3-900-by-next-friday-according-to-ai-modelling-133052">https://theconversation.com/covid-19-death-toll-estimated-to-reach-3-900-by-next-friday-according-to-ai-modelling-133052</a>                                                       |
| 6            | How big will the coronavirus epidemic be? An epidemiologist updates his concerns                                  | 9/3/20           | <a href="https://theconversation.com/how-big-will-the-coronavirus-epidemic-be-an-epidemiologist-updates-his-concerns-133133">https://theconversation.com/how-big-will-the-coronavirus-epidemic-be-an-epidemiologist-updates-his-concerns-133133</a>                                                                   |
| 7            | Scientists are still searching for the source of COVID-19: why it matters                                         | 12/3/20          | <a href="https://theconversation.com/scientists-are-still-searching-for-the-source-of-covid-19-why-it-matters-133467">https://theconversation.com/scientists-are-still-searching-for-the-source-of-covid-19-why-it-matters-133467</a>                                                                                 |
| 8            | Coronavirus: Three lessons from the AIDS crisis                                                                   | 16/3/20          | <a href="https://theconversation.com/coronavirus-three-lessons-from-the-aids-crisis-133575">https://theconversation.com/coronavirus-three-lessons-from-the-aids-crisis-133575</a>                                                                                                                                     |
| 9            | Viruses live on doorknobs and phones and can get you sick—smart cleaning and good habits can help protect you     | 17/3/20          | <a href="https://theconversation.com/viruses-live-on-doorknobs-and-phones-and-can-get-you-sick-smart-cleaning-and-good-habits-can-help-protect-you-133054">https://theconversation.com/viruses-live-on-doorknobs-and-phones-and-can-get-you-sick-smart-cleaning-and-good-habits-can-help-protect-you-133054</a>       |
| 10           | Fleeing from the coronavirus is dangerous for you, the people you encounter along the way and wherever you end up | 23/3/20          | <a href="https://theconversation.com/fleeing-from-the-coronavirus-is-dangerous-for-you-the-people-you-encounter-along-the-way-and-wherever-you-end-up-133995">https://theconversation.com/fleeing-from-the-coronavirus-is-dangerous-for-you-the-people-you-encounter-along-the-way-and-wherever-you-end-up-133995</a> |

|    |                                                                                                                                          |         |                                                                                                                                                                                                                                                                                                                                                               |
|----|------------------------------------------------------------------------------------------------------------------------------------------|---------|---------------------------------------------------------------------------------------------------------------------------------------------------------------------------------------------------------------------------------------------------------------------------------------------------------------------------------------------------------------|
| 11 | Coronavirus: are people with blood group A really at higher risk of catching COVID-19?                                                   | 23/3/20 | <a href="http://theconversation.com/coronavirus-are-people-with-blood-group-a-really-at-higher-risk-of-catching-covid-19-134181">http://theconversation.com/coronavirus-are-people-with-blood-group-a-really-at-higher-risk-of-catching-covid-19-134181</a>                                                                                                   |
| 12 | How can I treat myself if I've got—or think I've got—coronavirus?                                                                        | 27/3/20 | <a href="https://theconversation.com/how-can-i-treat-myself-if-ive-got-or-think-ive-got-coronavirus-134654">https://theconversation.com/how-can-i-treat-myself-if-ive-got-or-think-ive-got-coronavirus-134654</a>                                                                                                                                             |
| 13 | Coronavirus: loss of smell and taste reported as early symptoms of COVID-19                                                              | 27/3/20 | <a href="https://theconversation.com/coronavirus-loss-of-smell-and-taste-reported-as-early-symptoms-of-covid-19-134564">https://theconversation.com/coronavirus-loss-of-smell-and-taste-reported-as-early-symptoms-of-covid-19-134564</a>                                                                                                                     |
| 14 | Coronavirus FAQs: Can people without symptoms spread COVID-19? How long does it live on surfaces? What cleaning products kill the virus? | 29/3/20 | <a href="https://theconversation.com/coronavirus-faqs-can-people-without-symptoms-spread-covid-19-how-long-does-it-live-on-surfaces-what-cleaning-products-kill-the-virus-134945">https://theconversation.com/coronavirus-faqs-can-people-without-symptoms-spread-covid-19-how-long-does-it-live-on-surfaces-what-cleaning-products-kill-the-virus-134945</a> |
| 15 | Predicting COVID-19: what applying a model in Kenya would look like                                                                      | 30/3/20 | <a href="https://theconversation.com/predicting-covid-19-what-applying-a-model-in-kenya-would-look-like-134675">https://theconversation.com/predicting-covid-19-what-applying-a-model-in-kenya-would-look-like-134675</a>                                                                                                                                     |
| 16 | A small trial finds that hydroxychloroquine is not effective for treating coronavirus                                                    | 3/4/20  | <a href="https://theconversation.com/a-small-trial-finds-that-hydroxychloroquine-is-not-effective-for-treating-coronavirus-135484">https://theconversation.com/a-small-trial-finds-that-hydroxychloroquine-is-not-effective-for-treating-coronavirus-135484</a>                                                                                               |
| 17 | Should everyone be wearing face masks? It's complicated                                                                                  | 8/4/20  | <a href="https://theconversation.com/should-everyone-be-wearing-face-masks-its-complicated-135548">https://theconversation.com/should-everyone-be-wearing-face-masks-its-complicated-135548</a>                                                                                                                                                               |
| 18 | Coronavirus: what causes a 'second wave' of disease outbreak, and could we see this in Australia?                                        | 9/4/20  | <a href="https://theconversation.com/coronavirus-what-causes-a-second-wave-of-disease-outbreak-and-could-we-see-this-in-australia-134125">https://theconversation.com/coronavirus-what-causes-a-second-wave-of-disease-outbreak-and-could-we-see-this-in-australia-134125</a>                                                                                 |
| 19 | Coronavirus: where do new viruses come from?                                                                                             | 14/4/20 | <a href="https://theconversation.com/coronavirus-where-do-new-viruses-come-from-136105">https://theconversation.com/coronavirus-where-do-new-viruses-come-from-136105</a>                                                                                                                                                                                     |
| 20 | Wildfire smoke worsens coronavirus risk, putting firefighters in extra danger                                                            | 15/4/20 | <a href="https://theconversation.com/wildfire-smoke-worsens-coronavirus-risk-putting-firefighters-in-extra-danger-136016">https://theconversation.com/wildfire-smoke-worsens-coronavirus-risk-putting-firefighters-in-extra-danger-136016</a>                                                                                                                 |
| 21 | Coronavirus: could the pandemic be controlled using existing vaccines like MMR or BCG?                                                   | 21/4/20 | <a href="https://theconversation.com/coronavirus-could-the-pandemic-be-controlled-using-existing-vaccines-like-mmr-or-bcg-136429">https://theconversation.com/coronavirus-could-the-pandemic-be-controlled-using-existing-vaccines-like-mmr-or-bcg-136429</a>                                                                                                 |
| 22 | Blood sugar levels may influence vulnerability to coronavirus, and controlling them through conventional means might be protective       | 22/4/20 | <a href="https://theconversation.com/blood-sugar-levels-may-influence-vulnerability-to-coronavirus-and-controlling-them-through-conventional-means-might-be-protective-136592">https://theconversation.com/blood-sugar-levels-may-influence-vulnerability-to-coronavirus-and-controlling-them-through-conventional-means-might-be-protective-136592</a>       |

|    |                                                                                                                     |         |                                                                                                                                                                                                                                                                                                                           |
|----|---------------------------------------------------------------------------------------------------------------------|---------|---------------------------------------------------------------------------------------------------------------------------------------------------------------------------------------------------------------------------------------------------------------------------------------------------------------------------|
| 23 | Coronavirus: are we underestimating how many people have had it? Sweden thinks so                                   | 23/4/20 | <a href="https://theconversation.com/coronavirus-are-we-underestimating-how-many-people-have-had-it-sweden-thinks-so-136893">https://theconversation.com/coronavirus-are-we-underestimating-how-many-people-have-had-it-sweden-thinks-so-136893</a>                                                                       |
| 24 | Flushing is our next weapon against COVID-19, if you're happy to have your sewage scrutinised                       | 24/4/20 | <a href="https://theconversation.com/flushing-is-our-next-weapon-against-covid-19-if-youre-happy-to-have-your-sewage-scrutinised-136844">https://theconversation.com/flushing-is-our-next-weapon-against-covid-19-if-youre-happy-to-have-your-sewage-scrutinised-136844</a>                                               |
| 25 | 5 reasons it's safe for kids to go back to school                                                                   | 26/4/20 | <a href="https://theconversation.com/5-reasons-its-safe-for-kids-to-go-back-to-school-137064">https://theconversation.com/5-reasons-its-safe-for-kids-to-go-back-to-school-137064</a>                                                                                                                                     |
| 26 | In search of coronavirus treatments—the opportunities and challenges of using existing drugs                        | 27/4/20 | <a href="https://theconversation.com/in-search-of-coronavirus-treatments-the-opportunities-and-challenges-of-using-existing-drugs-136899">https://theconversation.com/in-search-of-coronavirus-treatments-the-opportunities-and-challenges-of-using-existing-drugs-136899</a>                                             |
| 27 | The coronavirus genome is like a shipping label that lets epidemiologists track where it's been                     | 27/4/20 | <a href="https://theconversation.com/the-coronavirus-genome-is-like-a-shipping-label-that-lets-epidemiologists-track-where-its-been-136826">https://theconversation.com/the-coronavirus-genome-is-like-a-shipping-label-that-lets-epidemiologists-track-where-its-been-136826</a>                                         |
| 28 | Evidence obesity is a risk factor for serious illness with coronavirus is mounting, even if you're young            | 28/4/20 | <a href="https://theconversation.com/evidence-obesity-is-a-risk-factor-for-serious-illness-with-coronavirus-is-mounting-even-if-youre-young-137081">https://theconversation.com/evidence-obesity-is-a-risk-factor-for-serious-illness-with-coronavirus-is-mounting-even-if-youre-young-137081</a>                         |
| 29 | Infected with the coronavirus but not showing symptoms? A physician answers 5 questions about asymptomatic COVID-19 | 30/4/20 | <a href="https://theconversation.com/infected-with-the-coronavirus-but-not-showing-symptoms-a-physician-answers-5-questions-about-asymptomatic-covid-19-137029">https://theconversation.com/infected-with-the-coronavirus-but-not-showing-symptoms-a-physician-answers-5-questions-about-asymptomatic-covid-19-137029</a> |
| 30 | What you need to know about how coronavirus is changing science                                                     | 5/5/20  | <a href="https://theconversation.com/what-you-need-to-know-about-how-coronavirus-is-changing-science-137641">https://theconversation.com/what-you-need-to-know-about-how-coronavirus-is-changing-science-137641</a>                                                                                                       |
| 31 | Coronavirus tests are pretty accurate, but far from perfect                                                         | 6/5/20  | <a href="https://theconversation.com/coronavirus-tests-are-pretty-accurate-but-far-from-perfect-136671">https://theconversation.com/coronavirus-tests-are-pretty-accurate-but-far-from-perfect-136671</a>                                                                                                                 |
| 32 | Maybe coronavirus's aggressiveness could be changed by adding or subtracting sugar molecules from its spike protein | 7/5/20  | <a href="https://theconversation.com/maybe-coronaviruss-aggressiveness-could-be-changed-by-adding-or-subtracting-sugar-molecules-from-its-spike-protein-137388">https://theconversation.com/maybe-coronaviruss-aggressiveness-could-be-changed-by-adding-or-subtracting-sugar-molecules-from-its-spike-protein-137388</a> |
| 33 | As restrictions ease, here are 5 crucial ways for Australia to stay safely on top of COVID-19                       | 12/5/20 | <a href="https://theconversation.com/as-restrictions-ease-here-are-5-crucial-ways-for-australia-to-stay-safely-on-top-of-covid-19-138000">https://theconversation.com/as-restrictions-ease-here-are-5-crucial-ways-for-australia-to-stay-safely-on-top-of-covid-19-138000</a>                                             |

|    |                                                                                                                                                        |         |                                                                                                                                                                                                                                                                                                                                                                                               |
|----|--------------------------------------------------------------------------------------------------------------------------------------------------------|---------|-----------------------------------------------------------------------------------------------------------------------------------------------------------------------------------------------------------------------------------------------------------------------------------------------------------------------------------------------------------------------------------------------|
| 34 | We designed an experimental AI tool to predict which COVID-19 patients are going to get the sickest                                                    | 14/5/20 | <a href="https://theconversation.com/we-designed-an-experimental-ai-tool-to-predict-which-covid-19-patients-are-going-to-get-the-sickest-136125">https://theconversation.com/we-designed-an-experimental-ai-tool-to-predict-which-covid-19-patients-are-going-to-get-the-sickest-136125</a>                                                                                                   |
| 35 | How do you stay safe now that states are reopening? An expert explains how to assess risk when reconnecting with friends and family                    | 18/5/20 | <a href="https://theconversation.com/how-do-you-stay-safe-now-that-states-are-reopening-an-expert-explains-how-to-assess-risk-when-reconnecting-with-friends-and-family-138518">https://theconversation.com/how-do-you-stay-safe-now-that-states-are-reopening-an-expert-explains-how-to-assess-risk-when-reconnecting-with-friends-and-family-138518</a>                                     |
| 36 | Rapid home-based coronavirus tests are coming together in research labs, we're working on analyzing spit using advanced CRISPR gene editing techniques | 20/5/20 | <a href="https://theconversation.com/rapid-home-based-coronavirus-tests-are-coming-together-in-research-labs-were-working-on-analyzing-spit-using-advanced-crispr-gene-editing-techniques-138064">https://theconversation.com/rapid-home-based-coronavirus-tests-are-coming-together-in-research-labs-were-working-on-analyzing-spit-using-advanced-crispr-gene-editing-techniques-138064</a> |
| 37 | How to lower your coronavirus risk while eating out: Restaurant advice from an infectious disease expert                                               | 21/5/20 | <a href="https://theconversation.com/how-to-lower-your-coronavirus-risk-while-eating-out-restaurant-advice-from-an-infectious-disease-expert-138925">https://theconversation.com/how-to-lower-your-coronavirus-risk-while-eating-out-restaurant-advice-from-an-infectious-disease-expert-138925</a>                                                                                           |
| 38 | How leadership in various countries has affected COVID-19 response effectiveness                                                                       | 27/5/20 | <a href="https://theconversation.com/how-leadership-in-various-countries-has-affected-covid-19-response-effectiveness-138692">https://theconversation.com/how-leadership-in-various-countries-has-affected-covid-19-response-effectiveness-138692</a>                                                                                                                                         |
| 39 | Coronavirus may wane this summer, but don't count on any seasonal variation to end the pandemic                                                        | 15/4/20 | <a href="https://theconversation.com/coronavirus-may-wane-this-summer-but-dont-count-on-any-seasonal-variation-to-end-the-pandemic-136218">https://theconversation.com/coronavirus-may-wane-this-summer-but-dont-count-on-any-seasonal-variation-to-end-the-pandemic-136218</a>                                                                                                               |
| 40 | Coronavirus drifts through the air in microscopic droplets—here's the science of infectious aerosols                                                   | 24/4/20 | <a href="https://theconversation.com/coronavirus-drifts-through-the-air-in-microscopic-droplets-heres-the-science-of-infectious-aerosols-136663?">https://theconversation.com/coronavirus-drifts-through-the-air-in-microscopic-droplets-heres-the-science-of-infectious-aerosols-136663?</a>                                                                                                 |
| 41 | Coronavirus: there's no one perfect model of the disease                                                                                               | 3/4/20  | <a href="https://theconversation.com/coronavirus-weve-had-imperial-oxford-and-many-more-models-but-none-can-have-all-the-answers-135137">https://theconversation.com/coronavirus-weve-had-imperial-oxford-and-many-more-models-but-none-can-have-all-the-answers-135137</a>                                                                                                                   |

Table 2. The full list of *The Conversation* titles and hyperlinks

| Facebook Codes              | Krippendorff's alpha |
|-----------------------------|----------------------|
| Facebook Space Type         | 0.948                |
| Twitter Account Type        | 0.867                |
| Facebook Space Actor Group  | 0.907                |
| Twitter Account Actor Group | 0.816                |

Table 3. Intercoder Reliability for Facebook and Twitter coding

| Space Type     | <u>Likes</u> |        |        | <u>Reactions</u> |        |        | <u>Shares</u> |        |        | <u>Comments</u> |        |       |
|----------------|--------------|--------|--------|------------------|--------|--------|---------------|--------|--------|-----------------|--------|-------|
|                | Mean         | Median | SD     | Mean             | Median | SD     | Mean          | Median | SD     | Mean            | Median | SD    |
| Group          | 5.74         | 2      | 22.69  | 9.25             | 1      | 28.88  | 2.32          | 0      | 9.63   | 5.84            | 0      | 18.78 |
| Page           | 98.58        | 6      | 692.35 | 89.06            | 4      | 509.62 | 57.15         | 3      | 369.49 | 17              | 0      | 68.98 |
| Public Profile | 32.83        | 7      | 79.44  | 35.72            | 8.5    | 89.65  | 20.83         | 4.5    | 52.31  | 8.83            | 1      | 26.75 |
| Unknown        | 16.75        | 2.5    | 33.59  | 27.83            | 2      | 56.36  | 19.5          | 2      | 38.04  | 4.83            | 0      | 9.56  |

Table 4. Engagement by Facebook Space Type

| Account Type | <u>Likes</u> |        |       | <u>Retweets</u> |        |       | <u>Replies</u> |        |       |
|--------------|--------------|--------|-------|-----------------|--------|-------|----------------|--------|-------|
|              | Mean         | Median | SD    | Mean            | Median | SD    | Mean           | Median | SD    |
| Group        | 3.82         | 1.5    | 6.02  | 2.38            | 1      | 3.43  | 0.24           | 0      | 0.65  |
| Individual   | 7.11         | 0      | 83.53 | 2.83            | 0      | 31.19 | 1.1            | 0      | 10.73 |
| Unknown      | 0.87         | 0      | 3.09  | 0.37            | 0      | 1.99  | 0.45           | 0      | 0.82  |

Table 5. Engagement by Twitter Account Type

| Actor Group                | <u>Likes</u> |        |        | <u>Reactions</u> |        |        | <u>Shares</u> |        |        | <u>Comments</u> |        |       |
|----------------------------|--------------|--------|--------|------------------|--------|--------|---------------|--------|--------|-----------------|--------|-------|
|                            | Mean         | Median | SD     | Mean             | Median | SD     | Mean          | Median | SD     | Mean            | Median | SD    |
| Academia                   | 19.44        | 11     | 23.34  | 15.15            | 6      | 18.71  | 9.37          | 3      | 14.15  | 3.52            | 0      | 7.67  |
| Business                   | 1.33         | 0      | 2.31   | 0                | 0      | 0      | 0             | 0      | 0      | 0               | 0      | 0     |
| Citizen                    | 61.55        | 2      | 603.47 | 44.38            | 1      | 401.73 | 27.95         | 0      | 301.7  | 9.61            | 0      | 46.42 |
| Civil Society Organisation | 6.73         | 3      | 10.1   | 3.73             | 1      | 5.96   | 2             | 1      | 3.42   | 1               | 0      | 2.48  |
| Healthcare                 | 9            | 2.5    | 12.68  | 8.88             | 1      | 14.12  | 4.25          | 0      | 7.42   | 2.75            | 0      | 4.86  |
| Media and Communication    | 26.59        | 8      | 48.04  | 45.66            | 6      | 106    | 22.18         | 4      | 43.83  | 18.67           | 0      | 60.96 |
| Political Actor            | 126.33       | 5      | 432.59 | 208.93           | 4      | 705.27 | 132.13        | 2      | 445.88 | 27.2            | 0      | 88.95 |
| Unknown                    | 18.25        | 4      | 33.17  | 30.83            | 6.5    | 55.69  | 22.17         | 2      | 37.67  | 5               | 0      | 9.49  |

Table 6. Facebook engagement by actor group



| Actor Group                | Likes |        |       | Retweets |        |       | Replies |        |       |
|----------------------------|-------|--------|-------|----------|--------|-------|---------|--------|-------|
|                            | Mean  | Median | SD    | Mean     | Median | SD    | Mean    | Median | SD    |
| Academia                   | 9.68  | 1      | 31.82 | 4.62     | 0      | 16.03 | 0.8     | 0      | 2.42  |
| Business                   | 2.38  | 0      | 6.17  | 1.01     | 0      | 3.1   | 0.39    | 0      | 0.84  |
| Citizen                    | 1.11  | 0      | 4.04  | 0.34     | 0      | 1.45  | 0.4     | 0      | 0.75  |
| Civil Society Organisation | 2.15  | 1      | 3.75  | 1.52     | 1      | 2.78  | 0.19    | 0      | 0.48  |
| Healthcare                 | 1.93  | 0      | 3.09  | 0.69     | 0      | 1.03  | 0.4     | 0      | 0.83  |
| Media and Communication    | 12.95 | 1      | 125.8 | 5.51     | 0      | 46.52 | 1.89    | 0      | 16.27 |
| Political Actor            | 2.91  | 1      | 4.28  | 1.45     | 0      | 2.38  | 0.73    | 0      | 1.01  |
| Unknown                    | 0.77  | 0      | 2.71  | 0.28     | 0      | 1.42  | 0.4     | 0      | 0.78  |

*Table 7. Twitter engagement across actor groups*
